# Supplementary material
Source: PubMed Central journal article supplement (PMC4304970)
Supplement: NIHMS643884-supplement-Supplemental_Tables_1_and_2.pdf [file NIHMS643884-supplement-Supplemental_Tables_1_and_2.pdf]

SUPPLEMENTAL MATERIAL

Supplementary Table I. Baseline lipid and lipoprotein characteristics among Black, Caucasian, Chinese, and Hispanic MESA study participants

| Lipid/Lipoprotein Measure   | Race/Ethnicity        |                    |                   |                      |
|-----------------------------|-----------------------|--------------------|-------------------|----------------------|
|                             | Caucasian<br>(N=1690) | Chinese<br>(N=556) | Black<br>(N=1328) | Hispanic<br>(N=1061) |
| TC, mg/dL (SD)              | 198.7 (34.6)          | 195.3 (31.1)       | 191.1 (36.3)      | 199.3 (37.2)         |
| LDL-C, mg/dL (SD)           | 120.0 (30.1)          | 117.9 (28.4)       | 118.2 (33.3)      | 121.8 (32.2)         |
| HDL-C, mg/dL (SD)           | 53.0 (16.2)           | 50.1 (13.3)        | 52.4 (15.4)       | 47.2 (12.8)          |
| TG, mg/dL (SD)              | 129.6 (94.6)          | 139.1 (81.0)       | 103.2 (69.0)      | 153.1 (91.6)         |
| LDL-P, particle number (SD) | 1256 (326)            | 1214 (298)         | 1224 (359)        | 1338 (350)           |
| ApoB, mg/dL (SD)            | 108.7 (28.7)          | 108.5 (24.6)       | 104.9 (28.8)      | 114.6 (27.1)         |
| ApoA-I, mg/dL (SD)          | 126.8 (27.8)          | 127.9 (48.1)       | 126.5 (25.6)      | 120.0 (24.5)         |

Supplementary Table II. Risk of incident CHD for lipoprotein particle markers and lipids in 4,679 MESA participants stratified by race and adjusted for non-lipid variables. Results for each marker are presented as hazard ratios for individuals in 4<sup>th</sup> quartiles, using respective 1<sup>st</sup> quartiles as referents; 95% confidence intervals and *P* values are specified.

| Race                | LDL-C                         | Non-HDL-C                                          | TC/HDL-C                                            | ApoB                                               | ApoB/ApoA                                           | LDL-P                                             | LDL-P/HDL-P                                            |
|---------------------|-------------------------------|----------------------------------------------------|-----------------------------------------------------|----------------------------------------------------|-----------------------------------------------------|---------------------------------------------------|--------------------------------------------------------|
| Caucasian<br>N=1690 | 1.68<br>(0.90, 3.14)<br>0.10  | <b>2.04</b><br><b>(1.14, 3.66)</b><br><b>0.016</b> | <b>2.68</b><br><b>(1.46, 4.92)</b><br><b>0.0015</b> | <b>2.15</b><br><b>(1.15, 4.03)</b><br><b>0.017</b> | <b>2.68</b><br><b>(1.45, 4.94)</b><br><b>0.0017</b> | <b>1.88</b><br><b>(1.03, 3.43)</b><br><b>0.39</b> | <b>3.43</b><br><b>(1.78, 6.60)</b><br><b>&lt;0.001</b> |
| Chinese<br>N=556    | 3.23<br>(0.85, 12.2)<br>0.084 | 3.30<br>(0.64, 16.9)<br>0.15                       | 2.32<br>(0.48, 11.1)<br>0.30                        | 2.01<br>(0.41, 9.82)<br>0.39                       | 1.43<br>(0.32, 6.28)<br>0.64                        | 1.73<br>(0.32, 9.22)<br>0.52                      | 1.73<br>(0.38, 7.83)<br>0.48                           |
| Black<br>N=1328     | 1.20<br>(0.87, 4.59)<br>0.10  | 1.44<br>(0.73, 2.84)<br>0.29                       | 1.65<br>(0.84, 3.23)<br>0.15                        | 1.62<br>(0.84, 3.12)<br>0.49                       | 1.46<br>(0.77, 2.76)<br>0.25                        | 1.41<br>(0.73, 2.71)<br>0.31                      | 1.43<br>(0.76, 2.68)<br>0.27                           |
| Hispanic<br>N=1061  | 2.00<br>(0.87, 4.59)<br>0.10  | 2.37<br>(0.94, 6.01)<br>0.069                      | 3.80<br>(0.86, 16.7)<br>0.078                       | 1.67<br>(0.69, 4.03)<br>0.26                       | 1.75<br>(0.69, 4.43)<br>0.24                        | 1.98<br>(0.79, 4.95)<br>0.15                      | 2.71<br>(0.92, 7.98)<br>0.070                          |

Adjusted for sex, hypertension meds, systolic blood pressure, age (category), diabetes, and smoking

CHD = coronary heart disease; TC = total cholesterol; LDL-C = low density lipoprotein cholesterol; HDL-C = high density lipoprotein cholesterol; ApoB = apolipoproteins B-100; ApoA-I = apolipoprotein A-I; LDL-P = LDL particle; HDL-P = HDL particle; MESA = Multi-ethnic Study of Atherosclerosis
